# Supplementary figures and images for: The impact of sectoral minimum wage laws on employment, wages, and hours of work in South Africa
Source: Springer Nature journal article supplement (doi:10.1186/2193-9020-2-1), 2013-01-17

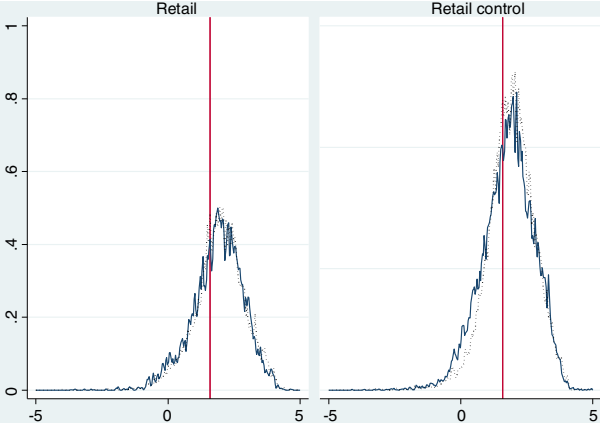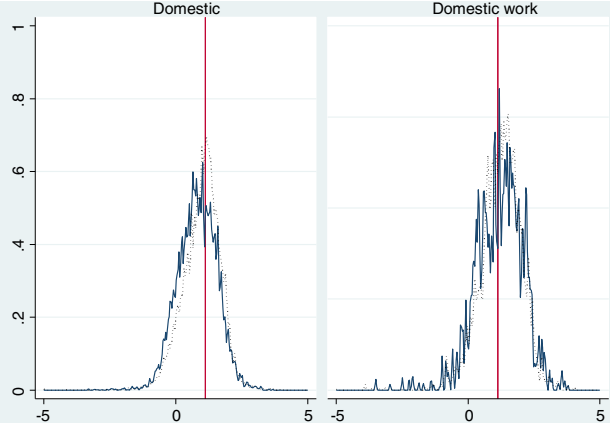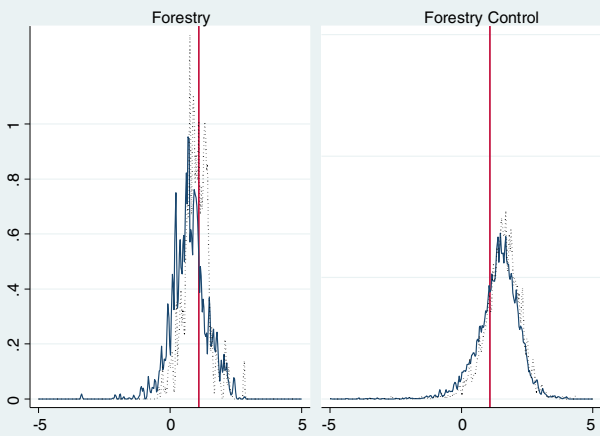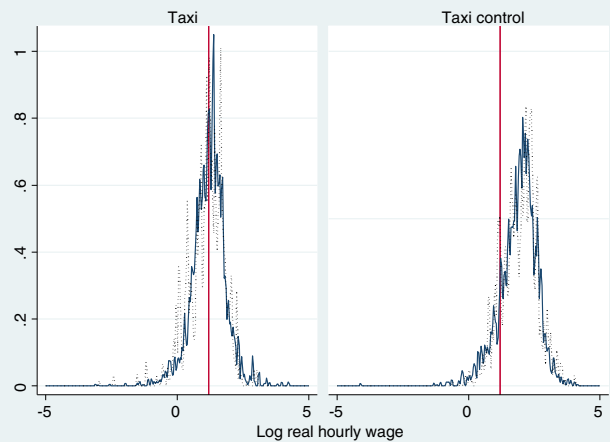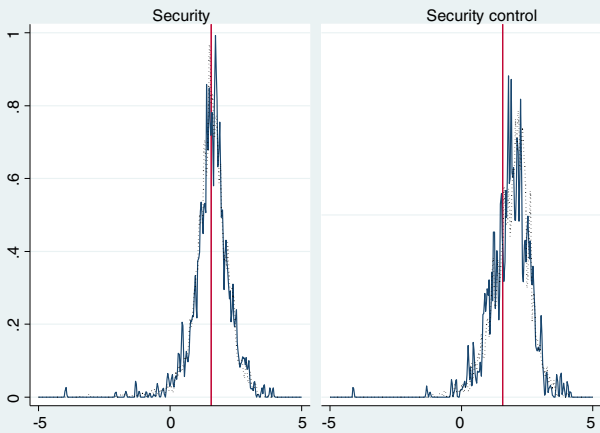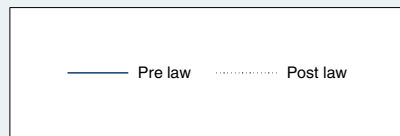

Supplement: 40175_2012_10_MOESM2_ESM.pdf [file 40175_2012_10_MOESM2_ESM.pdf]
